# Supplementary material for: Molecular dynamics simulations of proton conducting media containing phosphoric acid
Source: Royal Society of Chemistry journal article supplement (doi:10.1039/d2cp00484d), 2022-01-01
Supplement: d2cp00484d1.pdf [file d2cp00484d1.pdf]

**Supplementary Materials for**

**Molecular dynamics simulations of proton conducting  
mediums containing phosphoric acid**

Ryosuke Jinnouchi

Toyota Central R&D Labs., Inc., Nagakute, Aichi 480-1192, Japan

**Contents**

**S1 Size consistency**

**S2 MD simulation time**

## S1 Size consistency

The radial distribution functions (RDFs), diffusion coefficients of hydrogen atoms, lifetimes of  $H_nPO_4^{-(3-n)}$  ions, and rotational time calculated by the 200 ps MD simulations on the proton conductive  $48H_3PO_4$  and  $32CsH_2PO_4$  systems are compared with those calculated by the 200 ps MD simulations on  $96H_3PO_4$  and  $64CsH_2PO_4$  systems in Figs. S1 and S2, respectively.

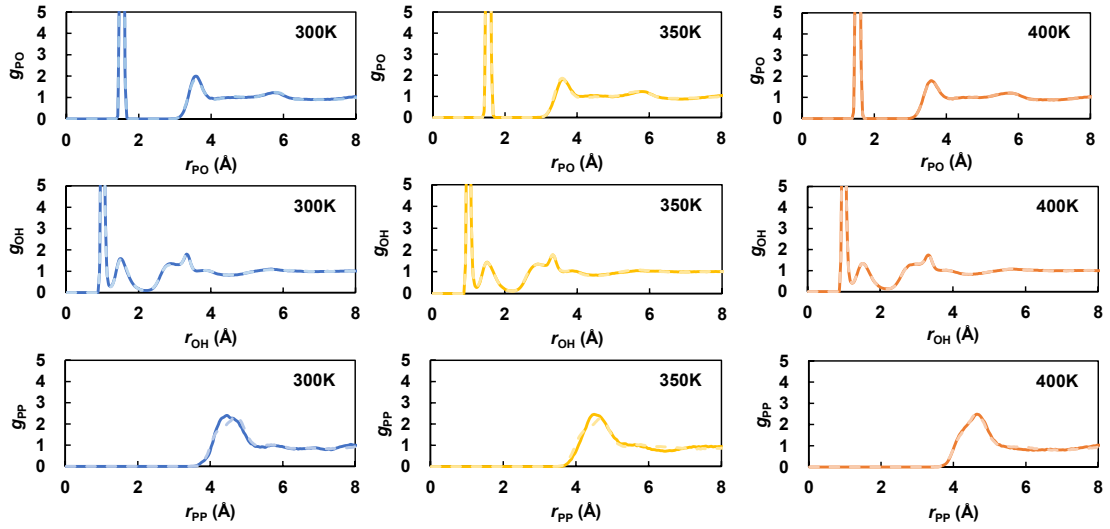

**Fig. S1** Radial distribution functions of  $48H_3PO_4$  (solid lines) and  $96H_3PO_4$  (dashed lines) at 300, 350 and 400 K.

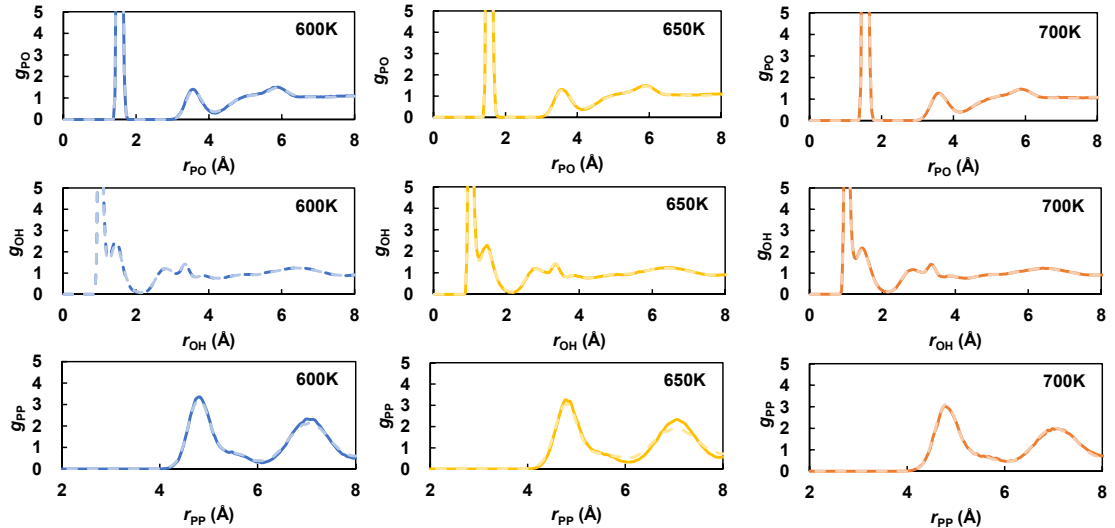

**Fig. S2** Radial distribution functions of  $32CsH_2PO_4$  (solid lines) and  $64CsH_2PO_4$  (dashed lines) obtained by 200 ps MD simulations at 600, 650 and 700 K.

**Table S1** Diffusion coefficients of hydrogen atoms ( $\text{m}^2 \text{s}^{-1}$ ) in  $48\text{H}_2\text{PO}_4$  and  $96 \text{H}_2\text{PO}_4$  obtained by 200 ps MD simulations.

| Temperature (K) | $48\text{H}_2\text{PO}_4$   | $96 \text{H}_2\text{PO}_4$  |
|-----------------|-----------------------------|-----------------------------|
| 300             | $0.21 \times 10^{-10}$      | $0.34 \times 10^{-10}$      |
| 350             | $0.76 \times 10^{-10}$      | $0.73 \times 10^{-10}$      |
| 400             | $2.33 \times 10^{-10}$      | $2.45 \times 10^{-10}$      |
| Temperature (K) | $32\text{CsH}_2\text{PO}_4$ | $64\text{CsH}_2\text{PO}_4$ |
| 600             | $0.54 \times 10^{-10}$      | $0.68 \times 10^{-10}$      |
| 650             | $1.17 \times 10^{-10}$      | $1.09 \times 10^{-10}$      |
| 700             | $1.21 \times 10^{-10}$      | $1.73 \times 10^{-10}$      |

**Table S2** Lifetimes of  $\text{H}_n\text{PO}_4^{(3-n)-}$  (fs) in  $48\text{H}_2\text{PO}_4$  and  $96 \text{H}_2\text{PO}_4$  obtained by 200 ps MD simulations.

| Temperature (K) | $n$ | $48\text{H}_2\text{PO}_4$   | $96 \text{H}_2\text{PO}_4$  |
|-----------------|-----|-----------------------------|-----------------------------|
| 300             | 2   | 56                          | 60                          |
|                 | 3   | 116                         | 109                         |
|                 | 4   | 46                          | 56                          |
| 350             | 2   | 41                          | 44                          |
|                 | 3   | 118                         | 95                          |
|                 | 4   | 44                          | 45                          |
| 400             | 2   | 40                          | 33                          |
|                 | 3   | 71                          | 76                          |
|                 | 4   | 42                          | 36                          |
| Temperature (K) | $n$ | $32\text{CsH}_2\text{PO}_4$ | $64\text{CsH}_2\text{PO}_4$ |
| 600             | 1   | 15                          | 16                          |
|                 | 2   | 36                          | 42                          |
|                 | 3   | 15                          | 17                          |
| 650             | 1   | 14                          | 16                          |
|                 | 2   | 34                          | 40                          |
|                 | 3   | 15                          | 16                          |
| 700             | 1   | 13                          | 14                          |
|                 | 2   | 33                          | 34                          |
|                 | 3   | 14                          | 15                          |

**Table S3** Reorientation time of  $H_nPO_4^{(3-n)-}$  (ps) in  $48H_2PO_4$  and  $96 H_2PO_4$  obtained by 200 ps MD simulations.

| Temperature (K) | $48H_2PO_4$   | $96H_2PO_4$   |
|-----------------|---------------|---------------|
| 300             | 1065          | 931           |
| 350             | 305           | 453           |
| 400             | 110           | 107           |
| Temperature (K) | $32CsH_2PO_4$ | $64CsH_2PO_4$ |
| 600             | 140           | 103           |
| 650             | 123           | 70            |
| 700             | 64            | 67            |

## S2 MD simulation time

In order to verify the MD simulation times, the correlation times of the three computational systems were examined by the statistical inefficiencies obtained by the method suggested in Refs. 39, 42 and 43. To calculate the statistical inefficiency, the MD trajectory is broken down into a series of  $N_{\text{block}}$  blocks of size  $M_{\text{block}}$ . The average of the property  $A$ , which is the potential energy similarly to Refs. 42 and 43, is calculated for each block as:

$$\langle A \rangle_b = \frac{\sum_{i=1}^{M_{\text{block}}} A_i}{M_{\text{block}}}. \quad (\text{S1})$$

The block averages become increasingly uncorrelated as the number of steps  $M_{\text{block}}$  in each block increases. The variance of the block averages,  $\sigma^2(\langle A \rangle_b)$ , becomes inversely proportional to  $N_{\text{block}}$ :

$$\sigma^2(\langle A \rangle_b) = \frac{\sum_{b=1}^{N_{\text{block}}} (\langle A \rangle_b - \langle A \rangle_{\text{total}})^2}{N_{\text{block}}}, \quad (\text{S2})$$

where  $\langle A \rangle_{\text{total}}$  is the average of the property  $A$  for the entire trajectory. The statistical inefficiency,  $s$ , is calculated as:

$$s = \lim_{M_{\text{block}} \rightarrow \infty} \frac{M_{\text{block}} \Delta t \sigma^2(\langle A \rangle_b)}{\sigma^2(\langle A \rangle_{\text{total}})}. \quad (\text{S3})$$

The statistical inefficiency is related to the correlation time,  $\tau$ , as  $s = 2\tau$  in a Markovian process. In actual computations, the convergency of the statistical inefficiency is examined increasing the block size  $M_{\text{block}}$  up to  $10^5$ . The computed statistical inefficiencies of the liquid PA,  $CsH_2PO_4$  and CP are summarized in Fig. S3. In all three systems, the correlation times are estimated to be much shorter than the MD simulation times. Accordingly, the correlations in the errors of MSDs are expected to be small.

The calculated MSDs of hydrogen atoms in the three materials are shown in Fig. S4, and the dependence of the computed diffusion coefficients of hydrogen atoms on the MD simulation time is summarized in Fig. S5. Here, the diffusion coefficients were calculated from the slopes of MSDs after 10 ps relaxations. For both liquid PA and cubic  $\text{CsH}_2\text{PO}_4$ , the simulation time of 200 ps is judged to be sufficiently long while for the monoclinic  $\text{CsH}_2\text{PO}_4$  and CP, considerably longer simulations will be required to quantitatively compute the diffusion coefficients.

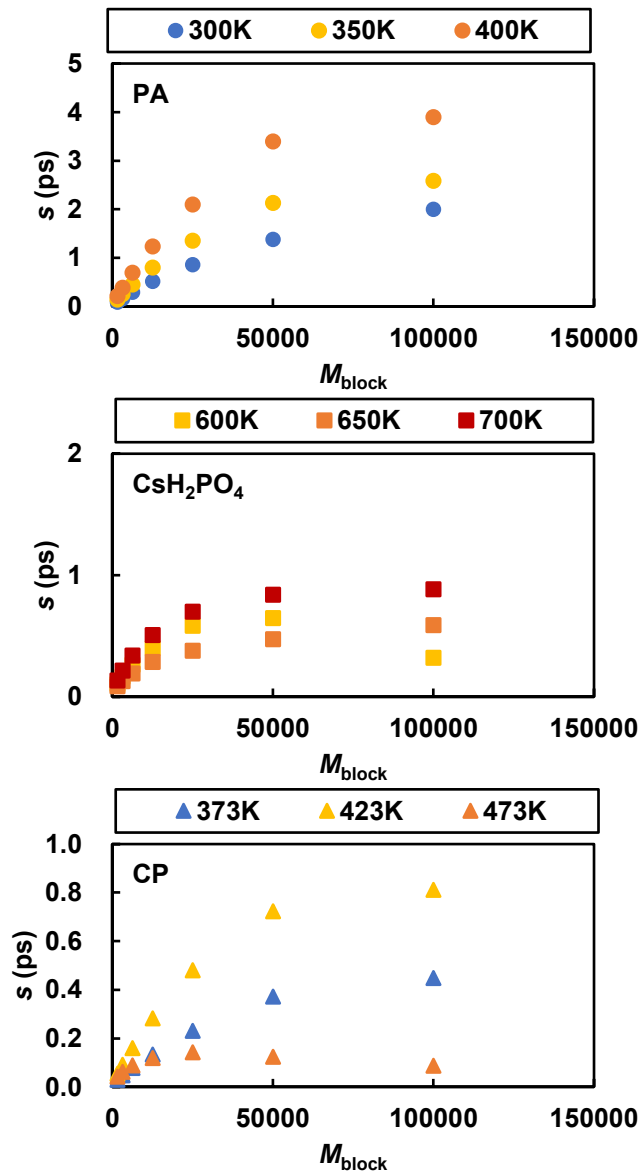

**Fig. S3** Statistical inefficiencies,  $s$ , of the liquid PA ( $48\text{H}_3\text{PO}_4$ ), cubic  $\text{CsH}_2\text{PO}_4$  ( $32\text{CsH}_2\text{PO}_4$ ) and CP (4 formula units of  $[\text{Zn}(\text{HPO}_4)(\text{H}_2\text{PO}_4)_2](\text{ImH}_2)_2$ ) as functions of the block size,  $M_{\text{block}}$ .

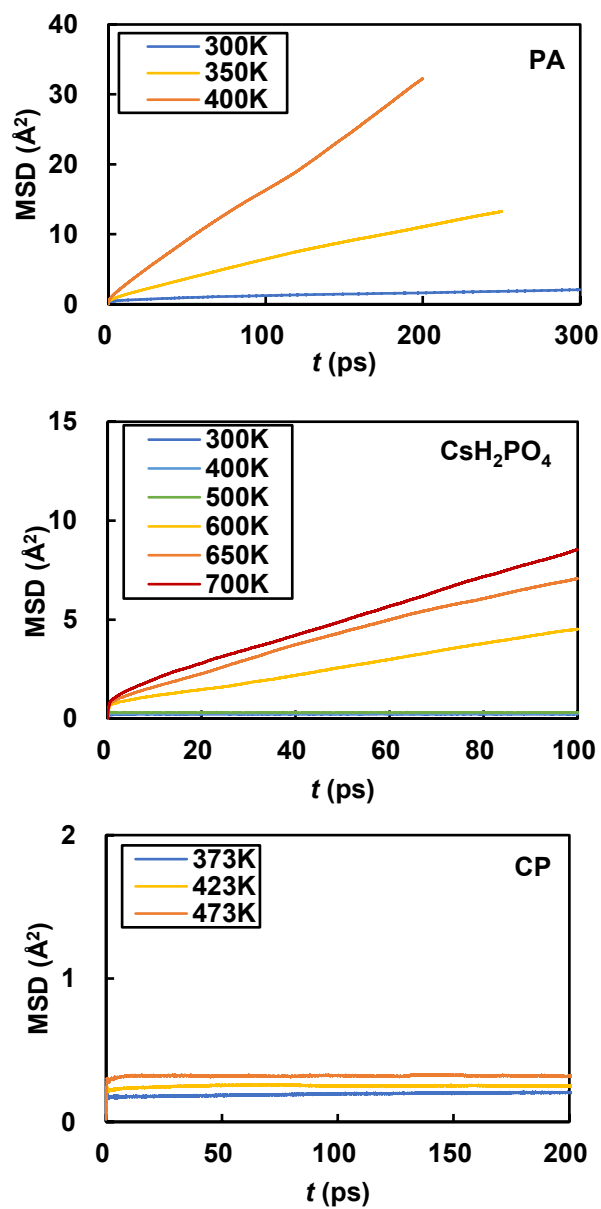

**Fig. S4** Mean square displacements (MSDs) of hydrogen atoms in the liquid PA ( $48\text{H}_3\text{PO}_4$ ),  $\text{CsH}_2\text{PO}_4$  ( $32\text{CsH}_2\text{PO}_4$ ) and CP (4 formula units of  $[\text{Zn}(\text{HPO}_4)(\text{H}_2\text{PO}_4)_2](\text{ImH}_2)_2$ ).

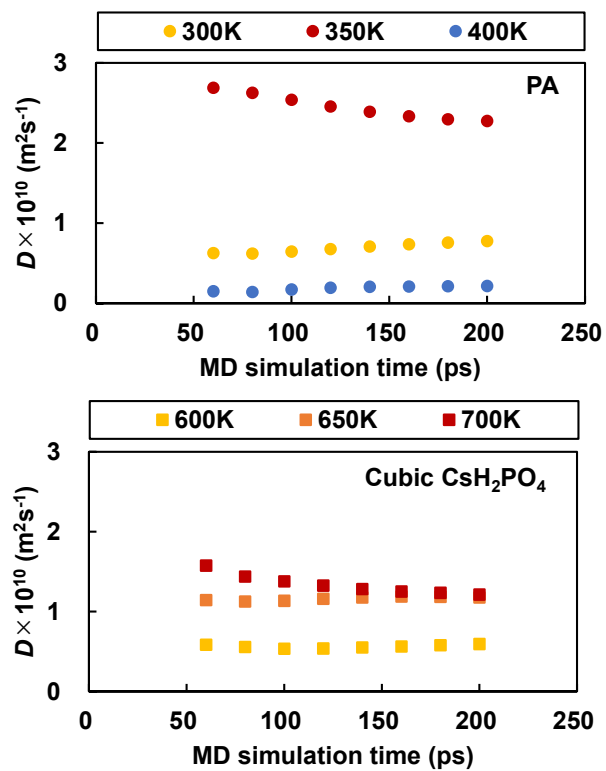

**Fig. S5** Dependence of the computed diffusion coefficients of hydrogen atoms in the liquid PA and cubic  $\text{CsH}_2\text{PO}_4$  on the MD simulation time.
